# Supplementary material for: A lupine (Lupinus angustifolious L.) peptide prevents non-alcoholic fatty liver disease in high-fat-diet-induced obese mice
Source: Royal Society of Chemistry journal article supplement (doi:10.1039/d0fo00206b), 2020-01-01
Supplement: d0fo00206b1.pdf [file d0fo00206b1.pdf]

1 **Supporting information**

2 **Table supplementary 1.** Sequence and GenBank accession number of  
3 oligonucleotides used in qRT-PCR.

4

| <b>Gen</b>                     | <b>No. GenBank</b> | <b>Dirección</b> | <b>Secuencia (5' → 3')</b> |
|--------------------------------|--------------------|------------------|----------------------------|
| <i>FAS</i>                     | NM_001146708.1     | <i>Forward</i>   | TGCAGACATGCTGTGGATCT       |
|                                |                    | <i>Reverse</i>   | GGGCTGAATTTCTGATGGTC       |
| <i>HGPRT</i>                   | NM_013556.2        | <i>Forward</i>   | TGCTCGAGATGTCATGAAGG       |
|                                |                    | <i>Reverse</i>   | TATGTCCCCCGTTGACTGAT       |
| <i>IL-1<math>\beta</math></i>  | NM_008361          | <i>Forward</i>   | GCCCATCCTCTGTGACTCAT       |
|                                |                    | <i>Reverse</i>   | AGGCCACAGGTATTTTGTCTG      |
| <i>IL-6</i>                    | NM_031168          | <i>Forward</i>   | AGTTGCCTTCTTGGGACTGA       |
|                                |                    | <i>Reverse</i>   | TCCACGATTTCCAGAGAAC        |
| <i>IL-10</i>                   | NM_010548.2        | <i>Forward</i>   | CCAGGGAGATCCTTTGATGA       |
|                                |                    | <i>Reverse</i>   | CATTCCCAGAGGAATTGCAT       |
| <i>OB-R</i>                    | NM_010704.2        | <i>Forward</i>   | AACTGCAGTCTTCGGGGATG       |
|                                |                    | <i>Reverse</i>   | AAGGGTGGATCGGGTTTCAC       |
| <i>PPAR<math>\alpha</math></i> | NM_001113418.1     | <i>Forward</i>   | GCCAGGTTTGACTGAACCAT       |
|                                |                    | <i>Reverse</i>   | GAGAAATGTGGCCAGGACAT       |
| <i>TNF-<math>\alpha</math></i> | NM_001278601       | <i>Forward</i>   | AGCCCCCAGTCTGTATCCTT       |
|                                |                    | <i>Reverse</i>   | CTCCCTTTGCAGAACTCAGG       |
| <i>UCP1</i>                    | NM_009463.3        | <i>Forward</i>   | GGGCCCTTGTAACAACAAA        |
|                                |                    | <i>Reverse</i>   | GTCGGTCCTTCCTTGGTGTA       |

5

6

7

8
